# Supplementary figures and images for: Changes in Volatile Composition of Cabernet Sauvignon (Vitis vinifera L.) Grapes under Leaf Removal Treatment
Source: MDPI journal article supplement (doi:10.3390/agronomy13071888), 2023-07-17

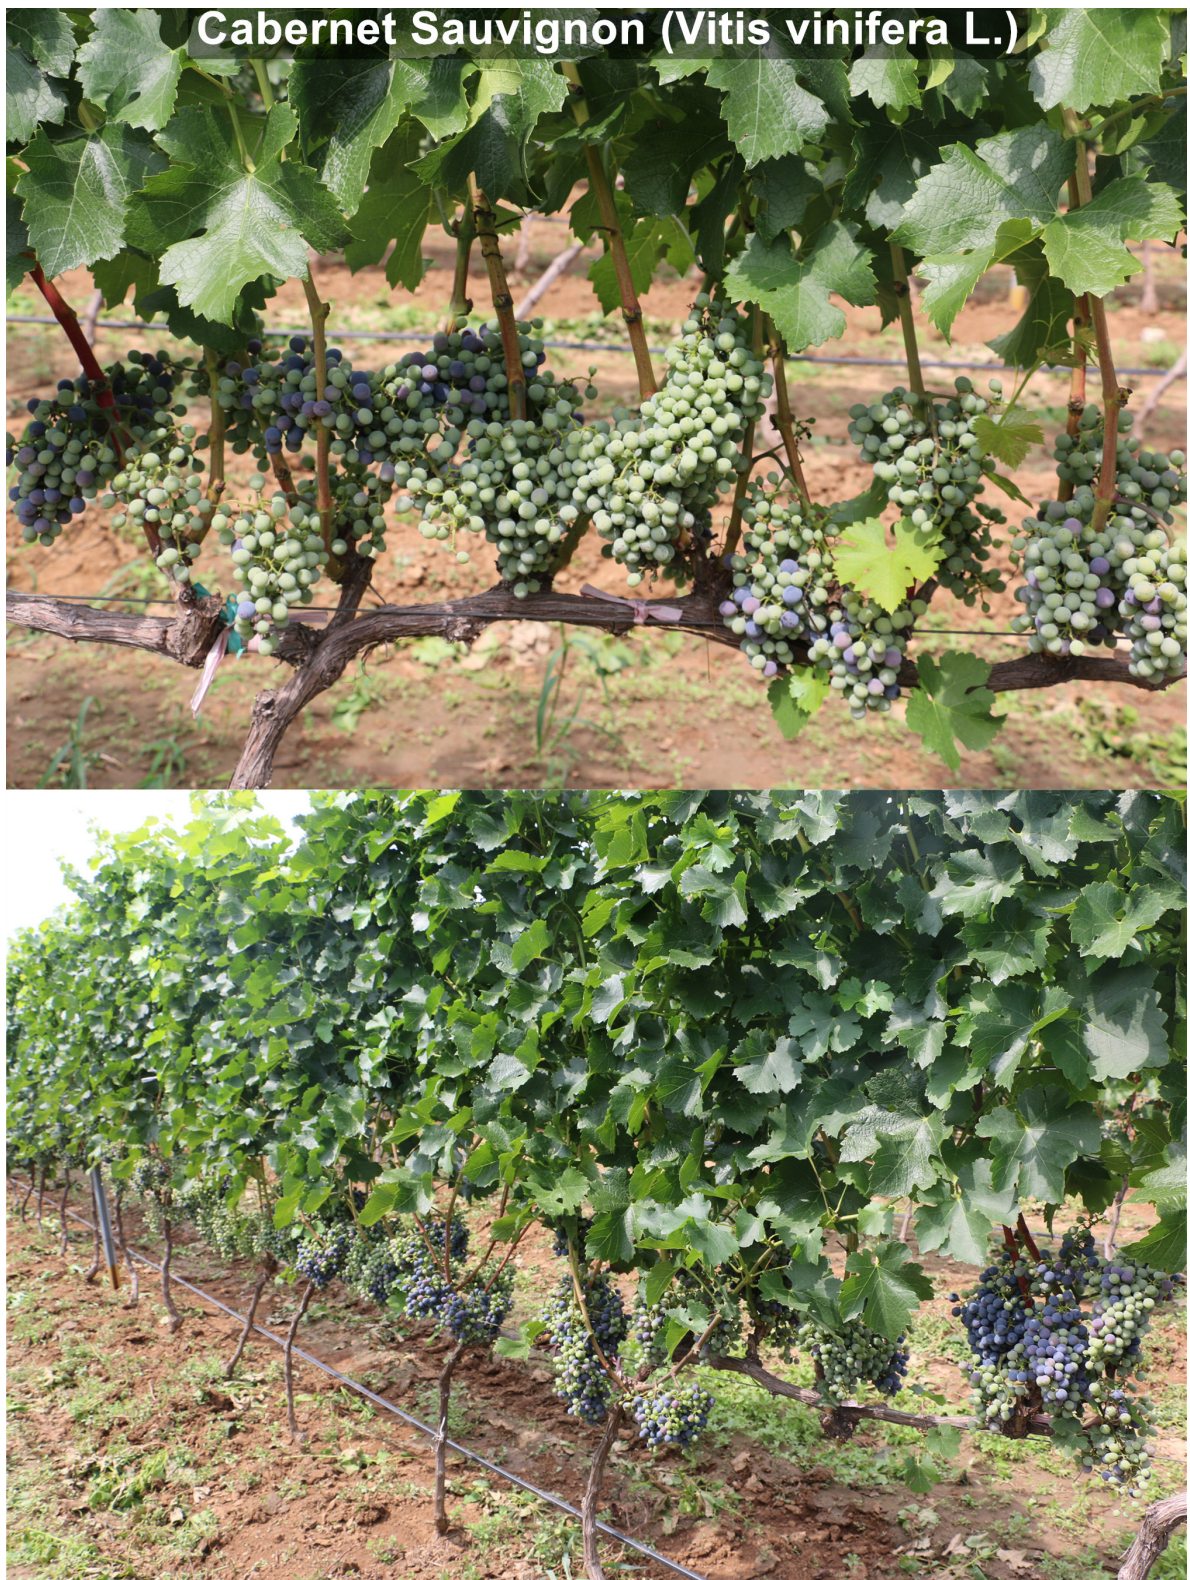

**Figure S1.** Photos of leaf removals.

Supplement: s1 [file s1]
